# Supplementary material for: Association between Higher Circulating Leucine-Rich α-2 Glycoprotein 1 Concentrations and Specific Plasma Ceramides in Postmenopausal Women with Type 2 Diabetes
Source: MDPI journal article supplement (doi:10.3390/biom12070943), 2022-07-05
Supplement: s1 [file s1]

## SUPPLEMENTARY MATERIAL

**Supplementary Table S1.** Spearman's correlation matrix among plasma ceramides, plasma LRG1 and other clinical/metabolic parameters.

|                 | Cer(d18:1/16:0) | Cer(d18:1/18:0) | Cer(d18:1/20:0) | Cer(d18:1/22:0) | Cer(d18:1/24:0) | Cer(d18:1/24:1) | LRG1         | Age          | BMI           | Cholesterol  | HOMA-IR       | HbA1c | PAS  | hsCRP | NEFA |
|-----------------|-----------------|-----------------|-----------------|-----------------|-----------------|-----------------|--------------|--------------|---------------|--------------|---------------|-------|------|-------|------|
| Cer(d18:1/16:0) | 1.00            |                 |                 |                 |                 |                 |              |              |               |              |               |       |      |       |      |
| Cer(d18:1/18:0) | <b>0.63**</b>   | 1.00            |                 |                 |                 |                 |              |              |               |              |               |       |      |       |      |
| Cer(d18:1/20:0) | <b>0.67**</b>   | <b>0.87**</b>   | 1.00            |                 |                 |                 |              |              |               |              |               |       |      |       |      |
| Cer(d18:1/22:0) | <b>0.62**</b>   | <b>0.48**</b>   | <b>0.64**</b>   | 1.00            |                 |                 |              |              |               |              |               |       |      |       |      |
| Cer(d18:1/24:0) | <b>0.57**</b>   | <b>0.32**</b>   | <b>0.47**</b>   | <b>0.86**</b>   | 1.00            |                 |              |              |               |              |               |       |      |       |      |
| Cer(d18:1/24:1) | <b>0.67**</b>   | <b>0.54**</b>   | <b>0.65**</b>   | <b>0.47**</b>   | <b>0.37**</b>   | 1.00            |              |              |               |              |               |       |      |       |      |
| LRG1            | <b>0.29**</b>   | <b>0.25**</b>   | <b>0.22*</b>    | 0.10            | 0.06            | <b>0.43**</b>   | 1.00         |              |               |              |               |       |      |       |      |
| Age             | -0.05           | -0.14           | -0.07           | <b>-0.22*</b>   | -0.15           | 0.09            | 0.11         | 1.00         |               |              |               |       |      |       |      |
| BMI             | 0.09            | 0.11            | 0.10            | 0.06            | -0.05           | 0.16            | 0.13         | -0.12        | 1.00          |              |               |       |      |       |      |
| Cholesterol     | <b>0.45**</b>   | <b>0.30**</b>   | <b>0.28**</b>   | <b>0.45**</b>   | <b>0.52**</b>   | <b>0.34**</b>   | 0.12         | -0.14        | 0.10          | 1.00         |               |       |      |       |      |
| HOMA-IR         | -0.01           | 0.13            | 0.18            | <b>0.26**</b>   | 0.14            | 0.03            | 0.05         | 0.01         | <b>0.37**</b> | 0.05         | 1.00          |       |      |       |      |
| HbA1c           | -0.18           | -0.07           | -0.09           | 0.08            | 0.03            | -0.19           | -0.14        | 0.01         | 0.11          | -0.16        | <b>0.30**</b> | 1.00  |      |       |      |
| PAS             | 0.10            | 0.03            | 0.03            | -0.07           | -0.11           | 0.16            | <b>0.22*</b> | <b>0.23*</b> | 0.16          | 0.12         | -0.03         | 0.09  | 1.00 |       |      |
| hs-CRP          | <b>0.36**</b>   | <b>0.23*</b>    | <b>0.22*</b>    | <b>0.26**</b>   | <b>0.23*</b>    | <b>0.37**</b>   | <b>0.22*</b> | -0.19        | <b>0.27**</b> | <b>0.23*</b> | 0.18          | 0.08  | 0.02 | 1.00  |      |
| NEFA            | 0.05            | 0.03            | 0.01            | 0.07            | 0.02            | 0.10            | 0.04         | 0.17         | 0.15          | 0.12         | 0.04          | 0.18  | 0.16 | 0.01  | 1.00 |

Sample size,  $n=99$ . Data are expressed as Spearman's rho correlation coefficients. For the sake of clarity, significant p-values are highlighted in bold.

\* $P$ -value  $<0.05$ ; \*\* $P$ -value  $<0.01$

**Supplementary Table S2.** Forward stepwise linear regression analyses: independent predictors of different plasma ceramide concentrations in post-menopausal women with T2DM.

| Forward stepwise linear regression analysis                                                                                        | $\beta$ coefficients (95% confidence intervals) | P-values |
|------------------------------------------------------------------------------------------------------------------------------------|-------------------------------------------------|----------|
| <b>Log Cer(d18:1/16:0)</b>                                                                                                         |                                                 |          |
| Forward-stepwise selection procedure<br>$p = 0.0001$ (<0.05) adding total cholesterol<br>$p = 0.0076$ (<0.05) adding LRG1          |                                                 |          |
| Total cholesterol (mg/dl)                                                                                                          | 0.003 (0.002-0.004)                             | <0.001   |
| LRG1 (1 <sup>st</sup> tertile vs. 2 <sup>nd</sup> and 3 <sup>rd</sup> tertiles combined)                                           | 0.101 (0.027-0.175)                             | 0.008    |
| <b>Log Cer(d18:1/18:0)</b>                                                                                                         |                                                 |          |
| Forward-stepwise selection procedure<br>$p = 0.0022$ (<0.05) adding LRG1<br>$p = 0.0057$ (<0.05) adding total cholesterol          |                                                 |          |
| LRG1 (1 <sup>st</sup> tertile vs. 2 <sup>nd</sup> and 3 <sup>rd</sup> tertiles combined)                                           | 0.214 (0.068-0.359)                             | 0.004    |
| Total cholesterol (mg/dl)                                                                                                          | 0.003 (0.001-0.005)                             | 0.006    |
| <b>Log Cer(d18:1/20:0)</b>                                                                                                         |                                                 |          |
| Forward-stepwise selection procedure<br>$p = 0.0036$ (<0.05) adding total cholesterol<br>$p = 0.0193$ (<0.05) adding LRG1          |                                                 |          |
| Total cholesterol (mg/dl)                                                                                                          | 0.002 (0.001-0.005)                             | 0.007    |
| LRG1 (1 <sup>st</sup> tertile vs. 2 <sup>nd</sup> and 3 <sup>rd</sup> tertiles combined)                                           | 0.167 (0.027-0.306)                             | 0.019    |
| <b>Log Cer(d18:1/22:0)</b>                                                                                                         |                                                 |          |
| Forward-stepwise selection procedure<br>$p = 0.0001$ (<0.05) adding total cholesterol<br>$p = 0.0023$ (<0.05) adding HOMA-IR score |                                                 |          |
| Total cholesterol (mg/dl)                                                                                                          | 0.005 (0.004-0.007)                             | <0.001   |
| Log HOMA-IR score                                                                                                                  | 0.115 (0.04-0.187)                              | 0.002    |
| <b>Log Cer(d18:1/24:0)</b>                                                                                                         |                                                 |          |
| Forward-stepwise selection procedure<br>$p = 0.0001$ (<0.05) adding total cholesterol<br>$p = 0.0147$ (<0.05) adding HbA1c         |                                                 |          |
| Total cholesterol (mg/dl)                                                                                                          | 0.004 (0.003-0.006)                             | <0.001   |
| HbA1c (%)                                                                                                                          | 0.084 (0.017-0.151)                             | 0.015    |
| <b>Log Cer(d18:1/24:1)</b>                                                                                                         |                                                 |          |
| Forward-stepwise selection procedure<br>$p = 0.0002$ (<0.05) adding total cholesterol<br>$p = 0.0011$ (<0.05) adding LRG1          |                                                 |          |
| Total cholesterol (mg/dl)                                                                                                          | 0.004 (0.002-0.006)                             | <0.001   |
| LRG1 (1 <sup>st</sup> tertile vs. 2 <sup>nd</sup> and 3 <sup>rd</sup> tertiles combined)                                           | 0.241 (0.099-0.382)                             | 0.001    |

Sample size,  $n=99$ . Data are expressed as beta coefficients and 95% confidence intervals (in parenthesis) as tested by forward-stepwise selection linear regression analysis. Each plasma ceramide (logarithmically transformed before statistical analysis) was the dependent variable in each forward-stepwise selection linear regression model. The significance level for addition to the model was  $p$ -value <0.05. Covariates included in the forward-stepwise selection linear regression models were: LRG1 (1<sup>st</sup> tertile vs. 2<sup>nd</sup> and 3<sup>rd</sup> tertiles combined), age, BMI, HbA1c, total cholesterol level, HOMA-estimated insulin resistance, systolic blood pressure and statin use.

**Abbreviations:** Cer, ceramides; HOMA-IR, homeostasis model assessment-insulin resistance; Log, logarithmic; LRG1, leucine-rich- $\alpha$ 2 glycoprotein 1.
